# Supplementary material
Source: publisher figshare collection journal article supplement (https://acs.figshare.com/ndownloader/files/3891394)
Supplement: Supplementary file 1 [file 3891394]

## Solid Solutions $\text{CaF}_2\text{-YF}_3$ with Fluorite Structure Prepared on the Sol-Gel Route: Investigation by Multinuclear MAS NMR Spectroscopy

Thoralf Krahl <sup>a,b</sup>, Gudrun Scholz <sup>a</sup>, Erhard Kemnitz <sup>a,b,\*</sup>

<sup>a</sup> Humboldt-Universität zu Berlin, Department of Chemistry, Brook-Taylor-Str. 2, D-12489 Berlin, Germany

<sup>b</sup> Nanofluor GmbH, Rudower Chaussee 29, D-12489 Berlin, Germany,

\* Corresponding author, mail: erhard.kemnitz@chemie.hu-berlin.de

### Table of Contents

|                                                               |           |
|---------------------------------------------------------------|-----------|
| <sup>19</sup> F MAS NMR spectra of <b>2</b> $\text{CaF}_2$ -s | Figure S1 |
| Cubic Lattice parameters from XRD                             | Table S1  |
| Calculation of metal-fluoride distances                       | Table S2  |
| Site occupation frequencies for cluster models                | Table S3  |

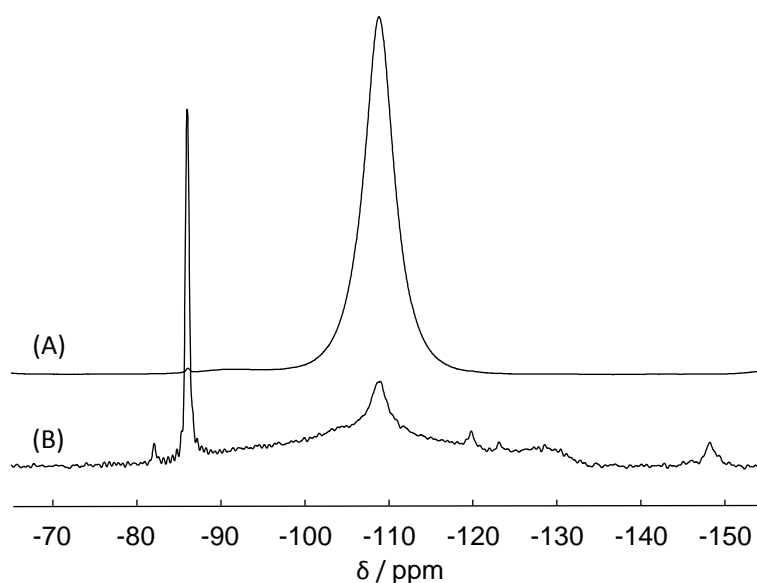

**Figure S1.** <sup>19</sup>F MAS NMR spectra of **2**  $\text{CaF}_2$ -s ( $\text{Ca}_{0.999}\text{Sm}_{0.001}\text{F}_{2.001}$ ). (A) single pulse, (B) rs-echo  $L0=30$ .

**Table S1.** Cubic lattice parameters extracted from XRD in dependence of the Y-doping level.

| Name                    | Lattice parameter       |
|-------------------------|-------------------------|
| CaF <sub>2</sub>        | $a = 5.463 \text{ \AA}$ |
| CaF <sub>2</sub> :Y05-s | $a = 5.469 \text{ \AA}$ |
| CaF <sub>2</sub> :Y10-s | $a = 5.481 \text{ \AA}$ |
| CaF <sub>2</sub> :Y20-s | $a = 5.499 \text{ \AA}$ |
| CaF <sub>2</sub> :Y40-s | $a = 5.533 \text{ \AA}$ |

**Table S2.** Calculation of the metal-fluoride distances needed for Figure 5.

|                                                                                                                             |                                                                                           |
|-----------------------------------------------------------------------------------------------------------------------------|-------------------------------------------------------------------------------------------|
| Cubic lattice constant of CaF <sub>2</sub>                                                                                  | $a_0 = 5.463 \text{ \AA}$                                                                 |
| Coordinates of the metal ions forming an octahedron                                                                         | (0, 0.5, 0.5) (1, 0.5, 0.5)<br>(0.5, 0, 0.5) (0.5, 1, 0.5)<br>(0.5, 0.5, 0) (0.5, 0.5, 1) |
| Coordinates of the defect fluoride ion (for $x = 0.5$ , all of these fluorides are located in the middle of the octahedron) | 24e (x, 0.5, 0.5)<br>32f (x, x, x)<br>48i (x, x, 0.5)                                     |
| Calculation of $d_{M-F}$ between F at ( $a_1, a_2, a_3$ ) and M at ( $b_1, b_2, b_3$ )                                      | $d_{M-F} = a_0 \left( \sum_{i=1}^3 (a_i - b_i)^2 \right)^{\frac{1}{2}}$                   |

**Table S3.** Site occupation frequencies (s.o.f.) needed for cubic Ca<sub>1-x</sub>Y<sub>x</sub>F<sub>2+x</sub> ( $x = 0 \dots 0.40$ ) to fulfill the condition that all additional fluoride ions are located in well-defined clusters ( $Fm\bar{3}m$ ,  $Z = 4$ ). *wyck*: Wyckoff position (first number is the multiplicity), *s.o.f.*: site occupation frequency.

| atom | wyck | s.o.f.<br>8:12:0 | s.o.f.<br>8:12:1   |
|------|------|------------------|--------------------|
| Ca   | 4a   | $1 - x$          | $1 - x$            |
| Y    | 4a   | $x$              | $x$                |
| Fn   | 8c   | $1 - x$          | $1 - \frac{4}{5}x$ |
| F'   | 32f  | 0                | $\frac{1}{40}x$    |
| F''  | 48i  | $\frac{1}{4}x$   | $\frac{1}{5}x$     |
